1 **Genetic analysis reveals efficient sexual spore dispersal at a fine spatial scale in *Armillaria***  
2 ***ostoyae*, the causal agent of root-rot disease in conifers**

3  
4  
5  
6 Cyril Dutech<sup>1,3</sup>, Frédéric Labbé<sup>1,2</sup>, Xavier Capdevielle<sup>1</sup>, Brigitte Lung-Escarmant<sup>1</sup>

7  
8  
9 <sup>1</sup> BIOGECO, INRA, Univ. Bordeaux, UMR 1202, F-33610 Cestas, France

10 <sup>2</sup> present address: Groningen Institute for Evolutionary Life Sciences (GELIFES), University of  
11 Groningen, Nijenborgh 7, 9747 AG Groningen, Netherlands

12  
13  
14 <sup>3</sup> corresponding author: BIOGECO, INRA, Univ. Bordeaux, UMR 1202, F-33610 Cestas, France,  
15 phone: 33 + 5 57 12 27 25, fax: 33 + 5 57 12 27 29, e-mail: [cyril.dutech@pierroton.inra.fr](mailto:cyril.dutech@pierroton.inra.fr)

16  
17  
18 **Keywords:** Forest disease, isolation by distance, maritime pine, planted forest, population size,  
19 single nucleotide polymorphism

20 **Abstract**

21

22 *Armillaria ostoyae* (sometimes named *A. solidipes*) is a fungal species causing root diseases in  
23 numerous coniferous forests of the northern hemisphere. The importance of sexual spores for the  
24 establishment of new disease centers remains unclear, particularly in the large maritime pine  
25 plantations of southwestern France. An analysis of the genetic diversity of a local fungal population  
26 distributed over 500 ha in this French forest showed genetic recombination between genotypes to be  
27 frequent, consistent with regular sexual reproduction within the population. The estimated spatial  
28 genetic structure displayed a significant pattern of isolation by distance, consistent with the  
29 dispersal of sexual spores mostly at the spatial scale studied. Using these genetic data, we inferred  
30 an effective density of reproductive individuals of 0.1 to 0.3 individuals/ha, and a second moment  
31 of parent-progeny dispersal distance of 130 to 800 m, compatible with the main models of fungal  
32 spore dispersal. These results contrast with those obtained for studies of *A. ostoyae* over larger  
33 spatial scales, suggesting that inferences about mean spore dispersal may be best performed at fine  
34 spatial scales (i.e. a few kilometers) for most fungal species.

35

## 36 **Introduction**

37

38       During their life-cycle, fungal species may either alternate sexual and asexual reproduction, or  
39 reproduce exclusively by one of these two modes of reproduction (e.g. Taylor et al. 1999). These  
40 reproduction strategies have important consequences for fungal demographics and evolution. For  
41 example, mostly asexual populations can produce large numbers of progenies rapidly, enabling  
42 them to colonize new environments to which they are already adapted (e.g. Hovmøller et al. 2008,  
43 Raboin et al. 2007). However, the absence of genetic recombination may decrease adaptation  
44 potential in a changing environment, because new genotypes can emerge only by mutation (Crow &  
45 Kimura 1965). Sexual and asexual propagules may also have different dispersal patterns, generating  
46 different population genetic structures at different spatial scales (Barrès et al. 2012, Rieux et al.  
47 2014). These different dispersal capacities may produce a spatial and temporal mosaic of genetic  
48 diversity, allowing natural selection to act at different spatial and temporal levels (Peay & Bruns  
49 2014, Thrall & Burdon 2002). Mode of reproduction is, therefore, an important biological trait that  
50 may vary with ecological context, as predicted and observed in invasive species (Bazin et al. 2014,  
51 Gladieux et al. 2015).

52

53       It is not always easy to infer the mode of reproduction and dispersal processes within species,  
54 or between populations of the same species. Sexual reproduction may be cryptic (Saleh et al. 2012),  
55 or not very efficient at producing new recombining genotypes within populations (Dutech et al.  
56 2010). Direct observations in the field may be rare or inconclusive. Population genetic analyses may  
57 therefore be more relevant for estimating the contribution of sexual reproduction events within and  
58 between populations (Halkett et al. 2005). First, analyses of genetic diversity performed at different  
59 spatial scales may reveal the different reproductive processes within species (e.g. Barrès et al. 2012,  
60 Dutech et al. 2008, Kohli et al. 1995). Second, methods using spatial genetic analysis to estimate

61 the genetic relatedness between individuals can be used to infer the spatial range of dispersal of  
62 sexual and asexual spores (e.g. Dutech et al. 2008, Rieux et al. 2011, Travadon et al. 2012), under  
63 the theoretical model of isolation by distance (IBD) (Rousset 1997, Vekemans & Hardy 2004,  
64 Wright 1943). However, despite the common use of such methods on fungal populations, the  
65 conclusions drawn about dispersal processes may sometimes be irrelevant, due to the use of an  
66 inappropriate spatial scale of investigation (see for example Rousset 1997 for theoretical  
67 considerations). Thus, conclusions that long-distance spore dispersal occurs based on an absence of  
68 spatial genetic structure among populations may be incorrect for several fungal species, as already  
69 shown for marine organisms with a large geographic distribution (Puebla et al. 2012). Puebla *et al.*  
70 showed that genetic analyses over fine spatial scales (i.e. a few meters to a few kilometers), and  
71 estimates of relatedness between genotypes, could, in some cases, better detect the effect of  
72 restricted progeny dispersal than studies performed at population level.

73

74 *Armillaria ostoyae* (Romagnesi) Herink is a fungal species for which the importance of sexual  
75 reproduction in the life-cycle remains unclear (Rishbeth 1988, Prospero et al. 2008). It was recently  
76 proposed an older name for this species: *A. solidipes* Peck, but this replacement name may be  
77 incorrect and may create confusion (Hunt et al. 2011). *Armillaria ostoyae*, responsible for butt- and  
78 root-rot diseases of conifers throughout the northern hemisphere, has two known modes of  
79 reproduction and dispersal. First, *A. ostoyae*, as other *Armillaria* species, produces a specific  
80 mycelium, known as a rhizomorph, for dispersal in the soil from one infected root to another  
81 susceptible host root (Lung-Escarmant & Guyon 2004, Redfern & Filip 1991). This vegetative  
82 propagation, also associated with a direct transmission from root to root, may lead to the  
83 development of a single-genotype clonal patch in a forest stand, sometimes covering a very large  
84 area (up to about 1000 ha; Ferguson et al. 2003). *A. ostoyae* also regularly produces fruiting bodies  
85 during the fall, and these fruiting bodies can release sexual haploid spores (i.e. the basidiospores)

86 into the air. The germination of two haploid compatible basidiospores and the fusion of their hyphae  
87 give rise to a new diploid genotype able to infect a new host tree (Rishbeth 1988). It has been  
88 assumed that sexual spores may occasionally be dispersed, by the wind, over tens of kilometers in  
89 many fungal species (Aylor 1990, Halbwachs & Bässler 2015). This mode of reproduction should,  
90 therefore, facilitate colonization by new genotypes and the development of new clonal patches some  
91 distance away from the original disease focus. However, the fusion of two sexual basidiospores  
92 leading to the colonization of a new host has rarely been observed or achieved in the field for *A.*  
93 *ostoyae*, raising questions about the frequency with which this process occurs in natural conditions  
94 for this species (e.g. Rishbeth 1970, Rishbeth 1988).

95

96 Several studies on *A. ostoyae* across the northern hemisphere have identified different  
97 population genetic structures potentially dependent on the ecological and climatic context of the  
98 forests studied. For example, in extensively managed cold North American forests, clonal structures  
99 of several tens to hundreds of hectares in size have frequently been reported (e.g. Dettman & Van  
100 der Kamp 2001a, Fergusson et al. 2003). By contrast, in the conifer forests of European mountain  
101 ranges, in which human activities have had a stronger impact on the ecosystem over a longer period  
102 of time, *A. ostoyae* generally displays higher levels of genotypic diversity and forms smaller clonal  
103 patches (e.g. Bendel et al. 2006, Legrand et al. 1996). In the maritime pine plantations of  
104 southwestern France, the Landes de Gascogne forest, small clonal patches associated with disease  
105 foci have also been described (Prospero et al. 2008). This genetic structure would be expected for a  
106 forest growing in a warm and wet climate, and with a rapid turnover of susceptible hosts due to  
107 intensive management of the plantation (Fergusson et al. 2003, Rishbeth 1988). As in previous  
108 studies, no genetic relatedness was detected between clonal patches. Two mutually exclusive  
109 hypotheses can be put forward to explain this absence of genetic structure. The first hypothesis is  
110 that sexual spores are regularly dispersed over long distances (i.e. over several tens of kilometers),

111 with efficient germination and fusion of basidiospores, in this forest, resulting in a random genetic  
112 structure (Prospero et al. 2008). This hypothesis has been also proposed for *A. mellea* in North  
113 America to explain the low estimated population genetic differentiation (Baumgartner et al. 2010).  
114 However, this hypothesis is not consistent with the limited spread of the disease observed over  
115 several decades in this forest. The disease is thought to have originated on the west coast of the  
116 region, where most forest areas were located before the large maritime pine plantations were  
117 established in the 19<sup>th</sup> century (Labbé et al. 2015, Prospero et al. 2008). The second hypothesis is  
118 that the spatial scale of the previous study, covering the entire area of the forest (i.e. around  $1 \times 10^6$   
119 ha) was inappropriate. Rare long-distance dispersal events can occur for sexual spores, but the mean  
120 dispersal distance is probably in the order of a few kilometers, as observed in other fungi (Rieux et  
121 al. 2014). In this context, as highlighted above, genetic studies at a spatial scale similar to that over  
122 which dispersal occurs are required to detect any spatial genetic structure associated with the  
123 dispersal process. We tested the IBD hypothesis at local scale, by analyzing the spatial genetic  
124 structure of *A. ostoyae* within a coastal forest in which several genotypes were identified in a  
125 previous study (Prospero et al. 2008), expanding the sampled area from less than one hectare to  
126 several hundred hectares.

127

128 Our main objectives were to use the recently developed molecular markers for *A. ostoyae*  
129 (Dutech et al. 2016) to: 1) estimate the importance of genetic recombination in the population  
130 studied; 2) characterize the spatial genetic structure of this population; 3) test the hypothesis of  
131 isolation by distance (Wright 1943), assuming that the mean dispersal distance of sexual spores is  
132 between a few hundred meters and a few kilometers; 4) estimate the spatial range over which spores  
133 are dispersed from genetic data.

134

135 **Materials and Methods**

136

137 Study site

138

139 The study was performed in the western part of the Landes de Gascogne Forest, in La Forêt  
140 Domaniale de Saint Julien en Born (1°,16',20"W – 44°,06',40"N) in southwestern France. This site  
141 is located on sandy dunes 4 km from the Atlantic Ocean. The forest is composed mostly of maritime  
142 pines (*Pinus pinaster*), with some oaks (*Quercus ilex*, *Q. robur*). Maritime pine is a local species  
143 that has been cultivated intensively in plantations since the 19<sup>th</sup> century, to help drain the marshes  
144 and swamps initially present in the area and for economic reasons (for details, see Labbé et al.  
145 2015). The populations of maritime pine on the coast were present before these large plantations  
146 were established. They formed small fragments of forest and were the first populations sown during  
147 this period to stabilize the sandy coastal dunes (Labbé et al. 2015). The coastal part of the Landes de  
148 Gascogne Forest is currently managed by the French National Forestry Office (*Office National des*  
149 *Forêts*), which favors management by natural regeneration or the sowing of maritime pine seeds  
150 after commercial logging.

151

152 We extended the initial sampling area used by Prospero et al. (2008), from the disease focus  
153 named “Contis” to the south of the stand. We obtained 177 mycelial fans from dead or dying  
154 maritime pines, by collecting mycelium from under the cork [at the collar of the trees](#) as described  
155 by Prospero et al. (2008). This previous study clearly identified clonal patches that were generally  
156 less than 1 ha in diameter and associated with a single disease focus. We maximized the chances of  
157 collecting different genotypes for studies of their genetic relationships, by collecting samples  
158 mostly from trees located at least 100 m apart (55% of the samples). The minimum distance  
159 separating two samples was 16 m; the maximum distance was 3474 m, and the total area sampled

160 was close to 500 ha. Samples were located with a GPS Trimble Geo7X, and GPS Pathfinder Office  
161 (Trimble Navigation Ltd, USA) was used for the processing of spatial data.

162

163 Molecular analysis

164

165 In the laboratory, we collected mycelium fans from each infected piece of wood sampled in the  
166 field, by detaching the mycelium from the cambium with a scalpel. These mycelium were freeze-  
167 dried overnight (-45°C, 0.3 mbar), and then ground with metallic beads in 2 ml microtubes, with an  
168 automatic grinder (GenoGrinder Sample Prep 2010, SPEX, USA), for 15 s at 1500 rpm. DNA was  
169 extracted from the ground mycelium in a cetyltrimethyl ammonium bromide (CTAB) buffer,  
170 according to the protocol described by Prospero et al. (2008).

171

172 Samples were genotyped for 27-single nucleotide polymorphisms (SNPs) identified in 24 genes  
173 present as single copies in most fungal genomes, and isolated by the PHYLORPH method (see for  
174 details, Feau et al. 2011). These 27 SNPs were selected from the list of 82 SNPs previously  
175 validated in two coastal *A. ostoyae* populations (Dutech et al. 2016). These SNPs were multiplexed,  
176 and genotyped in the medium-throughput MassARRAY iPLEX genotyping assay from Sequenom  
177 (San Diego, CA, USA), as described by Chancerel *et al.* (2013) and Dutech et al. (2016). [The](#)  
178 [choice of these SNPs was the best combination between keeping minimum one SNP per gene and](#)  
179 [the compatibility of their primers for genotyping them in a single Sequenom run.](#) Details of the 27  
180 genotyped SNPs are provided in Table 1.

181

182 **TABLE 1: Details of the 27 single-nucleotide polymorphisms (SNPs) analyzed in the *A.***  
183 ***ostoyae* population sampled from the St Julien en Born forest in southwestern France**

184



185 Data analyses

186

187 Repeated genotypes (i.e. identical for all 27 SNPs analyzed) were identified with GenoType  
188 V.1.2, excluding missing loci for each comparison (Meirmans & Van Tienderen 2004). For each  
189 SNP, allelic frequencies, genic diversity ( $H_E$ , Nei 1987) and intra-individual fixation index ( $F_{IS}$ )  
190 according to the Weir and Cockerham (1984) method were estimated with Genepop V.4.3  
191 (Raymond & Rousset 1995). Only one copy per genotype was retained, to exclude the effect of  
192 clonal structure on the estimates of genetic diversity. Exact tests for Hardy-Weinberg equilibrium  
193 within each population, and for linkage disequilibrium between SNPs were performed with  
194 Genepop. Correction for multiple testing was performed according to the false discovery rate  
195 method (FDR, Benjamini & Hochberg 1995), with the R package *fdrtool* V1.2.15 (Klaus &  
196 Strimmer 2013).

197

198 Spatial genetic structure was analyzed by two methods. First, the kinship coefficient was  
199 estimated for each pair of mycelial samples, using the estimate proposed by Loiselle et al. (1995).  
200 The mean per spatial distance classes was then plotted to generate a spatial autocorrelogram of the  
201 genetic relationships between samples. We defined the distance classes so as to obtain an even  
202 number of pairs of samples in each distance class. The first five distance intervals were each 150 m  
203 wide. Beyond 750 m, each of the next five classes was 250 m wide and then, after 2000 m, there  
204 were 500 m-wide classes, making it possible to estimate kinship coefficients over distances of up to  
205 3000 m. Each distance class contained at least 210 pairs of samples (obtained for the first distance  
206 class with the genotypes in single copy). Random permutations of the spatial locations of samples  
207 (1000 permutations) were performed to test the hypothesis that the mean kinship coefficient for  
208 each distance class was significantly different from that expected for a random spatial genetic  
209 structure. We investigated the effect of clonality on spatial genetic structure, by performing the

210 analysis both with all genotypes and with a single copy of each genotype randomly chosen from the  
211 copies.

212

213 The second method used to investigate spatial genetic structure was spatial principal component  
214 analysis (sPCA, Jombart et al. 2008). This method can be used to identify various spatial genetic  
215 structures (e.g. patches, clines, genetic barriers), without the need for assumptions concerning the  
216 genetic model, whereas Bayesian genetic clustering methods are dependent on the assumption of  
217 Hardy-Weinberg equilibrium. sPCA can be used to investigate the distribution of allelic diversity,  
218 by combining a principal component analysis (PCA) of allele frequencies and the spatial distance  
219 between samples. It can identify both global structures associated with the positive components of  
220 the analysis, reflecting the decrease in similarity between individuals with increasing spatial  
221 distance, and local structures associated with the negative components reflecting local  
222 dissimilarities between individuals located close together spatially (Jombart et al. 2008). Each  
223 significant structure detected was displayed by plotting the samples according to their geographic  
224 coordinates, color-coding and sizing them according to their scores along the significant sPCA axes.  
225 We determined whether the global and local structures were significantly different from a random  
226 structure by performing random permutations of sPCA components (999 permutations), and  
227 comparing the observed and simulated sPCA statistics as described by Jombart et al. (2008).  
228 Estimation and testing were performed with the R package Adegenet V2.0.1 (Jombart 2008), using  
229 a single copy per genotype to eliminate the effect of clonal structure on the analysis.

230

231 We tested the hypothesis of isolation by distance (IBD) associated with limited dispersal of the  
232 progeny from the parents (Wright 1943), by assuming a spatial dispersal of sexual spores in two  
233 dimensions. Under this hypothesis, the slope of the estimated kinship coefficient for each pair of  
234 samples decreases linearly with the logarithm of the spatial distance separating these pairs (Rousset

235 2000). The significance of the slope was tested by permutations of spatial distances between  
236 samples (1000 permutations) and Spearman's rank correlation analysis, as described by Rousset  
237 (2000). All the estimations of kinship coefficient and tests were performed with SPAGeDi V.1.5a  
238 (Hardy & Vekemans 2002).

239

240 We also estimated the effective size ( $N_e$ ) of the *A. ostoyae* population by a method based on the  
241 linkage disequilibrium between loci (Do et al. 2014, Waples & Do 2010). Estimates of  $N_e$  may be  
242 biased by a Wahlund effect in continuous populations, due to the limited dispersal of individuals or  
243 their gametes (Neel et al. 2013). We therefore estimated this parameter for both the whole sample,  
244 with a single copy per genotype, and for three subsamples of 30 genotypes each, with a maximum  
245 distance of 1000 m between samples from the same subsample. These subsamples, and which were  
246 smaller than the total sample, may be closer to the window in which most mating events occur, for  
247 which the effective number of parents responsible for producing the sample is best estimated (Neel  
248 et al. 2013). These three subsamples were evenly distributed over the sampling site, from north to  
249 south.  $N_e$  was estimated with NeEstimator V.2.1 (Do et al. 2014).

250

251 Finally, we estimated the second moment of parent-progeny dispersal (Rousset 2000) with the  
252 iterative procedure implemented in SPAGeDi V.1.5a (Hardy & Vekemans 2002). Assuming gene  
253 dispersal in two dimensions and a genetic drift-dispersal equilibrium (Wright 1943, Rousset 2000),  
254 the slope of the spatial autocorrelation of the kinship coefficient is  $1/(4\pi D_e \sigma^2)$ , where  $D_e$  is the  
255 effective density of reproductive individuals, and  $\sigma$  is the second moment of parent-progeny  
256 dispersal. However, this relationship should only be estimated in the range from  $\sigma$  to around 10 or  
257  $20\sigma$  (Rousset 2000). Outside this range, it may be biased by the shape of the dispersal function,  
258 mutation and migration events. As this range is generally not known, the iterative procedure uses an  
259 estimate of  $D_e$ , and yields a first estimate of  $\sigma$  obtained from all the spatial distances analyzed. The

260 value of  $\sigma$  is then re-estimated, considering a spatial range associated with this first estimate of  $10\sigma$   
261 or  $20\sigma$ , until  $\sigma$  and the spatial range converge. For  $D_e$ , we used the density of genotypes obtained  
262 from our sampling, or the estimate obtained from NeEstimator V.2.1.

263

## 264 **Results**

265

266 In total, 177 samples were analyzed for the 27 SNPs, and 149 different genotypes were  
267 detected. Seventeen genotypes occurred at least twice (eight genotypes occurred twice, seven  
268 occurred three times and two occurred four times). The minimum and maximum distance between  
269 identical genotypes were 27 m and 371 m, respectively, with a mean value of 120 m. Genetic  
270 diversity, estimated with  $H_E$ , was between 0.046 (MS481\_1) and 0.501 (FG691\_1 and FG756\_1),  
271 with a mean value of 0.36 (SE  $\pm$  0.02) (Table 1). The intra-individual fixation index ( $F_{IS}$ ) was  
272 estimated at between -0.151 (FG735\_1) and 0.452 (MS467\_8), with a mean value of 0.02 (SE  $\pm$   
273 0.02). Overall, genotype frequencies did not differ significantly from that expected under Hardy-  
274 Weinberg equilibrium. Two loci (MS467\_8 and FG529\_1) displayed a significant departure of  
275 genotype frequencies from Hardy-Weinberg expectations ( $P$ -values  $< 1 \times 10^{-4}$  and 0.008,  
276 respectively; Table 1). However, this departure from expectations remained significant only for  
277 MS467\_8 after correction for multiple tests. In total, 351 comparisons were made for linkage  
278 disequilibrium, and 37 pairs of loci had significant  $P$ -values ( $< 0.05$ ). After correction for multiple  
279 testing, only four tests remained significant. Two were associated with genes from the same locus  
280 (FG771\_1 and FG771\_3, and FG848\_1 and FG848\_6). The other two significant tests concerned  
281 FG730\_3 and MS452\_3, and FG893\_1 and MS334\_3. Finally, to avoid any effect of linkage  
282 disequilibrium or departure from Hardy-Weinberg equilibrium on demographic inferences, we  
283 removed MS467\_8, FG771\_1, FG848\_1, FG730\_3 and FG893\_1, and used only 22 SNP loci for  
284 subsequent analyses.

285

286 **Figure 1: Relationships between kinship coefficients of pairs of *A. ostoyae* samples and the**  
287 **distance (in m) separating them**

288

289 The estimated kinship coefficient between pairs of *A. ostoyae* samples decreased steadily with  
290 increasing distance (Figure 1). Taking all the samples into account, the estimated kinship coefficient  
291 was 0.09 for the first distance class (0-150 m) and was close to zero beyond 450 m. With the  
292 exception of two distance classes (1500-1750 m and 1750-2000 m) kinship coefficient estimates at  
293 distances of more than 450 m were not significantly different from expectations for a random  
294 genetic structure. For the two remaining distance classes, the kinship coefficient was estimated at -  
295 0.01 and -0.025, respectively. A similar decrease in kinship coefficient with increasing distance was  
296 observed when only one copy of each genotype was considered. The estimate was lower for the first  
297 distance class (0.04), but identical for the second class and beyond, and not significantly different  
298 from that expected under a random genetic structure, except, once again, for the 1500-1750 m and  
299 1750-2000 m distance classes. The slope of the autocorrelation for one copy per genotype was -  
300 0.012 (SE  $\pm$  0.003), which was significantly different from zero in Spearman's rank correlation  
301 analysis on spatial locations ( $P$ -value  $<$  0.01).

302 Tests on the spatial structure estimated from sPCA showed that only the global structure,  
303 associated with positive eigenvalues, was significantly different from a random spatial structure  
304 (999 permutations,  $P$ -value = 0.011). The local structure associated with negative eigenvalues (999  
305 permutations,  $P$ -value = 0.256) was not significant. Several spatial clusters of samples with either  
306 the most positive or the most negative values on the first principal axis were observed within the  
307 population (Figure 2). Samples with a value close to zero were generally located between these  
308 clusters. These spatial clusters had a diameter of about 500 m-1000 m (Figure 2).

309

310 **Figure 2: Geographic distribution of sPCA values**

311

312 For the 149 genotypes sampled from an area of about 500 ha, the  $N_e$  estimate was 49.9 (95%  
313 CI, determined by a jackknife procedure: 33.6 – 77.3), yielding a  $D_e$  of 0.1 parents/ha. For each  
314 subsample of 30 genotypes from about 100 ha, the estimated value of  $N_e$  ranged between 14.4 and  
315 79.6 (mean = 40;  $D_e$  = 0.4 parents/ha). We therefore used three effective densities of parents to  
316 estimate  $\sigma$ , with the iterative procedure implemented in Spagedi. The first density used was that  
317 estimated with NeEstimator V.2.1 and the 149 genotypes. The second was the density of sampled  
318 genotypes over an area of 500 ha (0.3 parents/ha, similar to the density obtained with the three  
319 subsamples and NeEstimator V.2.1), and the third was a density 10 times greater than the census  
320 density, assuming an incomplete sampling of the area (3 parents/ha). The estimated value of  $\sigma$  was  
321 between 130 and 162 m for the highest effective density of 3 parents/ha, depending on the  
322 maximum distances considered for the regression (10  $\sigma$  and 20  $\sigma$ , respectively). The corresponding  
323 estimate was 830 m for the sampled density. No convergence was observed for density estimates  
324 obtained for the 149 genotypes with NeEstimator.

325

326 **Discussion**

327

328 The observed clonal fraction in this study was lower than previously reported for other  
329 European and North American *A. ostoyae* populations (e.g. Bendel et al. 2006, Dettman & Van Der  
330 Kamp 2001a, Prospero et al. 2003). In this forest in southwestern France, 90% of the genotypes  
331 identified were sampled only once. By contrast, in most of the other forests studied to date, most, if  
332 not all, genotypes were sampled several times. The sampling design of this study, with a minimal  
333 distance of 100 m between most of the pairs of field samples, may account for the small number of  
334 repeated genotypes. In a previous study on this maritime pine forest, most of the identical genotypes

335 associated with a single disease focus were sampled from trees less than this minimal distance apart  
336 (Prospero et al. 2008). It was difficult to estimate the size of clonal patches from our sample, but  
337 our results are consistent with an area of less than 1 ha, the estimate obtained in a previous study on  
338 this forest (Prospero et al. 2008, Labbé 2015, Lung et al. unpublished). This mean area of disease  
339 foci is among the smallest clonal patch sizes reported for *A. ostoyae* populations in Europe and  
340 North America, where estimates of greater than 1 ha, and up to 965 ha have been obtained (Bendel  
341 et al. 2006, Dettman and Van Der Kamp 2001a, Ferguson et al. 2003).

342

343 The large number of different genotypes estimated to be present in an area of only 500 ha in  
344 this study may be due to the more frequent production of fruiting bodies in coniferous forests in  
345 temperate climates than in those growing in a boreal or alpine climate. [Wet climates, as for this](#)  
346 [European coastal area, are assumed to be more conducive to \*Armillaria\* reproduction and](#)  
347 [germination of basidiospores on stumps or pieces of wood \(Rishbeth 1970\).](#) This higher frequency  
348 of sexual reproduction would favor the establishment of new genotypes over time, through the  
349 fusion of sexually compatible basidiospores, resulting in the establishment of large numbers of  
350 small clonal patches at the local scale. This hypothesis has been put forward and discussed before  
351 (Ferguson et al. 2003, Wargo & Shaw 1985), but there is currently no clear evidence for such a  
352 variation of fruiting in *A. ostoyae* populations with temperature and humidity. A second factor  
353 potentially explaining the higher level of local genotypic diversity is the extinction-recolonization  
354 dynamics of genotypes associated with high levels of environmental disturbance. In intensively  
355 managed forests, such as this single-species plantation, successive planting events after the removal  
356 or destruction of stumps could eradicate clonal patches, or at least initially decrease their size  
357 (Cleary et al. 2013). However, subsequently, as suggested in several previous studies, clear-cutting  
358 and the planting of new stands of conifers would favor colonization by new genotypes from  
359 basidiospores (see Rishbeth 1988, Worrall 1994, Legrand et al. 1996). Fresh dead wood remaining

360 after logging, such as stumps, or the small pieces of root remaining in the soil after stump removal,  
361 could serve as a substrate for the germination and fusion of basidiospores from neighboring infected  
362 forest stands (Rishbeth 1970, Rishbeth 1988), although this remains to be demonstrated. Plantations  
363 of maritime pine seedlings, which are very sensitive to *A. ostoyae* in the first years of their life  
364 (Lung-Escarmant & Guyon, 2004, Labbé et al. 2015), would also be favourable environments for  
365 the rapid spread of these new genotypes. Furthermore, the coastal region in which this study was  
366 performed, would have supported a large fungal population for several hundred years, potentially  
367 accounting for the large number of genotypes observed. Maritime pine populations have been  
368 present in this area for centuries and they may have hosted a large *A. ostoyae* population, consistent  
369 with the substantial presence of disease due to this fungus observed in this coastal area (Labbé et al.  
370 2015). In addition, the first seeds of this tree species were sown at this site, to stabilize the sandy  
371 dunes, in the middle of the 19<sup>th</sup> century, and this site has been managed ever since so as to keep the  
372 coastal forest intact, thereby decreasing the risk of local extinction for fungal pathogen populations.

373

374 A role for basidiospores in the establishment of genotypes was strongly suggested, but not  
375 clearly demonstrated, in a previous study on *A. ostoyae* in this planted forest of maritime pine  
376 (Prospero et al. 2008). The results reported here provide even stronger support for the hypothesis  
377 that the genotypes observed originated from the local dispersal of basidiospores rather than the  
378 evolution of divergent clonal lineages present for long periods in the soil, as is sometimes assumed  
379 (e.g. Worall et al. 1994). We observed no strong genetic linkage disequilibrium among the SNP  
380 loci, consistent with populations evolving sexually, at least occasionally, in the last few years  
381 (Halkett et al. 2005, Tibayrenc et al. 1991). Furthermore, a long history of clonal evolution should  
382 produce a Meselson effect, with allelic divergence leading to high levels of heterozygosity within  
383 genotypes (e.g. Ali et al. 2014). Such an effect is inconsistent with the observed level of  
384 homozygosity in this study, which was not significantly different from that expected. In addition,



385 the steady decrease in genetic relatedness with increasing spatial distance between the pairs of  
386 samples observed on the spatial correlogram is consistent with the IBD model, and the local  
387 dispersal of basidiospores, producing new genotypes. We cannot rule out the possibility that  
388 basidiospores can also fuse with some genotypes already present in the stand, via Buller's  
389 phenomenon, to produce new genotypes (Rizzo & May 1994). However, even if this process has  
390 been described in the laboratory, there is no evidence to suggest that it occurs frequently in natural  
391 conditions.

392

393 The presence of these recombining genotypes in this French population suggests that sexual  
394 reproduction is a key process in the population dynamics of *Armillaria* species. A similar genetic  
395 IBD pattern was detected for an *A. mellea* population in California (Travadon et al. 2012), and the  
396 authors also concluded that the local dispersal of basidiospores played an important role in the  
397 observed spatial genetic structure. By contrast, although numerous genotypes were observed, no  
398 IBD pattern was identified for *A. cepistipes* at nationwide scale in Switzerland (Heinzelmann et al.  
399 2011), and a similar lack of IBD was also observed by Prospero et al. (2008) for *A. ostoyae* at the  
400 scale of this French forest region. These conflicting results for IBD pattern highlight the importance  
401 of choosing an appropriate spatial scale for inferences concerning the spatial dispersal of progenies  
402 based on population genetic methods. If the spatial scale is too large relative to mean dispersal  
403 distance, the spatial genetic structure may be missed due to the complex patterns associated with the  
404 random effects of rare long-distance dispersal events, and genetic methods may not detect these  
405 processes efficiently (e.g. Schwartz & McKelvey. 2009, Wingen et al. 2007). If the spatial scale is  
406 too small relative to the mean dispersal distance, there may be too few comparisons between  
407 genotypes, which may constitute a serious limitation to the detection of spatial genetic structures,  
408 especially after removal of the clonal structure (e.g. Dutech et al. 2008). For example, the use of too  
409 few comparisons may account for the random structure observed in a North American population of

410 *A. ostoyae*, in which only a few transects of a few hundred meters in length were studied (Dettman  
411 & Van der Kamp 2001b).

412

413 The IBD pattern observed in this study was evenly distributed over the site, as sPCA revealed  
414 several spatial clusters of related genotypes with a diameter of about 1 km. This patchy genetic  
415 structure is consistent with an IBD pattern (Jombart et al. 2008), and a dispersal of the sexual spores  
416 over the spatial range of a few kilometers. This result suggests that there was no significant genetic  
417 structure, such as a genetic cline or barrier, other than IBD at this spatial scale. Spatial Bayesian  
418 clustering analyses detecting no significant genetic cluster also yielded similar conclusions (results  
419 not shown). Assuming that the *A. ostoyae* population is close to the genetic drift-dispersal  
420 equilibrium, then the genetic structure observed in this study can be attributed principally to IBD,  
421 and gene flow can be estimated from the slope of the spatial autocorrelation (Rousset et al. 2000,  
422 Vekemans & Hardy 2004). In the coastal area, the assumption of genetic equilibrium for *A. ostoyae*  
423 populations is realistic, because maritime pines were present for many thousands of years before the  
424 establishment of the large pine plantations in the 19<sup>th</sup> century (Paquereau 1964). Therefore, with an  
425 estimated generation time of between 10 and 20 years (Labbé 2015), several hundreds of  
426 generations of the fungus have probably developed in this area. Furthermore, simulations have  
427 shown that the IBD pattern rapidly becomes established at fine spatial scales after tens of  
428 generations for small effective population sizes, such as that estimated here (Bradbury & Bentzen  
429 2007, Leblois et al. 2003).

430

431 Assuming dispersal-drift equilibrium, we tried to estimate the second moment of parent-  
432 offspring dispersal, using several estimates of the effective density of parents. The method used to  
433 estimate this density yields robust estimates in isolated and panmictic populations, but has some  
434 biases when applied to continuous populations with an IBD structure (Neel et al. 2013). For

435 example, when the sampling window is larger than the breeding window (i.e. “the local area where  
436 most matings occur”, Neel *et al.* 2013), the population size may be underestimated for the sample.  
437 This estimated population size is often only one tenth the effective population size of the sampled  
438 area (Neel *et al.* 2013). Finally, we obtained estimated densities close to 0.3 parents/ha for the two  
439 types of sampling (i.e. total sample and subsamples), and close to the number of sampled  
440 genotypes. These similar results suggest that this estimate for this *A. ostoyae* population is relatively  
441 robust, and that the contribution of sexual reproduction is similar for each of the 149 genotypes  
442 sampled in this area. Only a small number of studies have reported estimates of effective population  
443 size for fungal populations. Ali *et al.* (2014) obtained an estimate of between 30 and 40 individuals  
444 for several Pakistani *Puccinia* populations, based on temporal genetic sampling. These results,  
445 which are similar to our own, indicate that effective population size may not always be as important  
446 as frequently assumed (e.g. McDonald & Linde 2002). Using this estimate of effective population  
447 size and the iterative procedure, we obtained a second moment of parent-descendant dispersal  
448 distance of between 100 and 800 m. This spatial range of dispersal is consistent with direct  
449 estimates of the mean dispersal distances for spores obtained for other fungal species and by direct  
450 methods (e.g. Rieux *et al.* 2014). All these results strongly suggest that long-dispersal events do  
451 occur occasionally, as reported for many other fungal species (Barrès *et al.* 2008), but that spore  
452 dispersal is mostly local (over a few hundred meters). [This estimate of limited dispersal suggests](#)  
453 [that ecological and evolutionary dynamics of \*Armillaria\* populations mainly occur at landscape](#)  
454 [scale, as for many microbial species \(Peay and Bruns, 2014\).](#)

455

456 It is generally not possible to draw any firm conclusions about the effect of basidiospore  
457 dispersal on the genetic structure of *A. ostoyae* populations from direct observations (e.g. Rishbeth  
458 1988). By contrast, our study clearly shows that, for this species, as for many other fungi, an  
459 analysis of spatial genetic structure can provide estimates of both sexual reproduction within

460 populations and the mean distance over which basidiospores disperse. However, we found no  
461 evidence of the significant spatial genetic structure observed for this species at larger spatial scales  
462 in this forest area (Prospero et al. 2008, Labbé 2015, Dutech et al. 2016). Our results are similar to  
463 those obtained for maritime organisms, for which non-linear patterns of IBD have been observed,  
464 depending on the spatial scale studied (Bradbury & Bentzen 2007). These studies have revealed  
465 that, for organisms with large spatial distributions, such as many fungal species, limited dispersal  
466 between the progenies and their parents is often estimated at fine spatial scales, but not at large  
467 spatial scales. Rather than being associated with high levels of gene flow that are difficult to  
468 estimate with genetic methods at large spatial scales (Wingen et al. 2007), these contrasting results  
469 reveal that choosing the most appropriate spatial scale of investigation is crucial to the correct  
470 estimation of dispersal processes by genetic methods, as pointed out by Rousset (1997).  
471 Conclusions about long-distance spore dispersal may, therefore, often be incorrect for many fungal  
472 species if only genetic differentiation between populations is considered. We advocated estimating  
473 dispersal at different spatial scales, to avoid misleading conclusions likely to hinder our  
474 understanding of fungal biology.

475

#### 476 **Acknowledgments**

477 We would like to thank M. Martin, N. Leymarie and O. Fabreguettes for their support and  
478 assistance during DNA extraction and laboratory work, and J-P Soularue for his useful comments.  
479 Genotyping was performed at the Genomic and Sequencing Facility of Bordeaux (grants from the  
480 *Conseil Régional d'Aquitaine* no. 20030304002FA and 20040305003FA and from the European  
481 Union, FEDER no. 2003227 and from *Investissements d'avenir, Convention attributive d'aide* No.  
482 ANR-10-EQPX-16-01). This work was supported by the POURPIN project (*Ministère français de*  
483 *l'agriculture et de la forêt, Département Santé des Forêts*) and by European funding through the  
484 interregional SUDOE FORRISK project (Network for Innovation in Silviculture and Integrated

485 Risk Management Systems in the Forest). F. Labbé was supported by a grant from INRA/Région  
486 Aquitaine.

487

## 488 **References**

- 489 Ali S, Gladieux P, Leconte M, et al, 2014. Origin, Migration Routes and Worldwide  
490 Population Genetic Structure of the Wheat Yellow Rust *Puccinia striiformis f. sp. tritici*. *Plos*  
491 *Pathogens*. **10** doi: 10.1371/journal.ppat.1003903
- 492 Aylor D, 1990. The role of intermittent wind in the dispersal of fungal pathogens. *Annual*  
493 *Review of Phytopathology* **28**:73–92.
- 494 Barrès B, Halkett F, Dutech C, et al, 2008. Genetic structure of the poplar rust fungus  
495 *Melampsora larici-populina*: Evidence for isolation by distance in Europe and recent founder  
496 effects overseas. *Infection Genetics and Evolution* **8**:577–587.
- 497 Barrès B, Dutech C, Andrieux A, et al, 2012. Exploring the role of asexual multiplication in  
498 poplar rust epidemics: impact on diversity and genetic structure. *Molecular Ecology* **21**:4996–5008.
- 499 Baumgartner K, Travadon R, Bruhn J, Bergemann, SE, 2010. Contrasting patterns of genetic  
500 diversity and population structure of *Armillaria mellea* sensu stricto in the eastern and western  
501 United States. *Phytopathology* **100**:708-718.
- 502 Bazin E, Mathe-Hubert H, Facon B, et al, 2014. The effect of mating system on invasiveness:  
503 some genetic load may be advantageous when invading new environments. *Biological Invasions*  
504 **16**:875–886.
- 505 Bendel M, Kienast F, Rigling D, 2006. Genetic population structure of three *Armillaria*  
506 species at the landscape scale: a case study from Swiss Pinus mugo forests. *Mycological Research*  
507 **110**:705–712.
- 508 Benjamini Y, Hochberg Y, 1995. Controlling the false discovery rate - A practical and  
509 powerful approach to multiple testing. *Journal of the Royal Statistical Society Series B-*  
510 *Methodological* **57**:289–300.
- 511 Bradbury IR, Bentzen P, 2007. Non-linear genetic isolation by distance: implications for  
512 dispersal estimation in anadromous and marine fish populations. *Marine Ecology Progress Series*  
513 **340**:245–257.
- 514 Chancerel E, Lepoittevin C, Le Provost G, et al, 2011. Development and implementation of a  
515 highly-multiplexed SNP array for genetic mapping in maritime pine and comparative mapping with  
516 loblolly pine. *BMC GENOMICS*. doi: 10.1186/1471-2164-12-368
- 517 Cleary MR, Arhipova N, Morrison DJ, et al, 2013. Stump removal to control root disease in  
518 Canada and Scandinavia: A synthesis of results from long-term trials. *Forest Ecology and*  
519 *Management* **290**:5–14.

- 520 Crow J, Kimura M, 1965. Evolution in Sexual and Asexual Populations. *American Naturalist*  
521 **99**:439–450.
- 522 Dettman JR, van der Kamp BJ, 2001a. The population structure of *Armillaria ostoyae* and  
523 *Armillaria sinapina* in the central interior of British Columbia. *Canadian Journal of Botany*  
524 **79**:600–611.
- 525 Dettman JR, van der Kamp BJ, 2001b. The population structure of *Armillaria ostoyae* in the  
526 southern interior of British Columbia. *Canadian Journal of Botany* **79**:612–620.
- 527 Do C, Waples RS, Peel D, et al, 2014. NEESTIMATOR v2: re-implementation of software  
528 for the estimation of contemporary effective population size ( $N_e$ ) from genetic data. *Molecular*  
529 *Ecology Resources* **14**:209–214.
- 530 Dutech C, Rossi J-P, Fabreguettes O, Robin C, 2008. Geostatistical genetic analysis for  
531 inferring the dispersal pattern of a partially clonal species: example of the chestnut blight fungus.  
532 *Molecular Ecology* **17**:4597–4607.
- 533 Dutech C, Fabreguettes O, Capdevielle X, Robin C, 2010. Multiple introductions of divergent  
534 genetic lineages in an invasive fungal pathogen, *Cryphonectria parasitica*, in France. *Heredity*  
535 **105**:220–228.
- 536 Dutech C, Prospero S, Heinzelmann R, Fabreguettes O, Feau N, 2016. Rapid identification of  
537 polymorphic sequences for both phylogenetic and population genetic analyses in non-model  
538 species: The PHYLORPH method tested in *Armillaria* species. *Forest Pathology* **46**:298–308.
- 539 Feau N, Decourcelle T, Husson C, et al, 2011. Finding Single Copy Genes Out of Sequenced  
540 Genomes for Multilocus Phylogenetics in Non-Model Fungi. *PLOS ONE*. doi:  
541 10.1371/journal.pone.0018803
- 542 Ferguson BA, Dreisbach TA, Parks CG, et al, 2003. Coarse-scale population structure of  
543 pathogenic *Armillaria* species in a mixed-conifer forest in the Blue Mountains of northeast Oregon.  
544 *Canadian Journal of Forest Research* **33**:612–623.
- 545 Gladieux P, Feurtey A, Hood ME, et al, 2015. The population biology of fungal invasions.  
546 *Molecular Ecology* **24**:1969–1986.
- 547 Halbwachs H, Bässler C, 2015. Gone with the wind - a review on basidiospores of lamellate  
548 agarics. *Mycosphere* **6**:78–112.
- 549 Halkett F, Simon J, Balloux F, 2005. Tackling the population genetics of clonal and partially  
550 clonal organisms. *Trends in Ecology & Evolution* **20**:194–201.
- 551 Hardy O, Vekemans X, 2002. SPAGeDI: a versatile computer program to analyse spatial  
552 genetic structure at the individual or population levels. *Molecular Ecology Notes* **2**:618–620.
- 553 Heinzelmann R, Rigling D, Prospero S, 2012. Population genetics of the wood-rotting  
554 basidiomycete *Armillaria cepistipes* in a fragmented forest landscape. *Fungal Biology* **116**:985–  
555 994.



- 556 Hovmøller MS, Yahyaoui AH, Milus EA, Justesen AF, 2008. Rapid global spread of two  
557 aggressive strains of a wheat rust fungus. *Molecular Ecology* **17**:3818–3826.
- 558 [Hunt RS, Morrison DJ, Bérubé J, 2011. \*Armillaria solidipes\* is not a replacement name for \*A.\*  
559 \*ostoyae\*. \*Forest Pathology\* 41: 253-254.](#)
- 560 Jombart T, 2008. Adegnet: a R package for the multivariate analysis of genetic markers.  
561 *Bioinformatics* **24**:1403–1405.
- 562 Jombart T, Devillard S, Dufour A-B, Pontier D, 2008. Revealing cryptic spatial patterns in  
563 genetic variability by a new multivariate method. *Heredity* **101**:92–103.
- 564 Klaus B, Strimmer K, 2013. Signal identification for rare and weak features: higher criticism  
565 or false discovery rates? *BIostatistics* **14**:129–143.
- 566 Kohli Y, Brunner L, Yoell H, et al, 1995. Clonal dispersal and spatial mixing in populations  
567 of the plant-pathogenic fungus, *Sclerotinia sclerotiorum*. *Molecular Ecology* **4**:69–77.
- 568 Labbé F, Marçais B, Dupouey J-L, et al, 2015. Pre-existing forests as sources of pathogens?  
569 The emergence of *Armillaria ostoyae* in a recently planted pine forest. *Forest Ecology and*  
570 *Management* **357**:248–258.
- 571 Labbé F. 2015. *Étude de l'émergence et de la dynamique évolutive d'Armillaria ostoyae,*  
572 *agent pathogène du pin maritime*. PhD thesis, Université de Bordeaux.
- 573 Legrand P, Ghahari S, Guillaumin JJ, 1996. Occurrence of genets of *Armillaria spp* in four  
574 mountain forests in central France: The colonization strategy of *Armillaria ostoyae*. *New*  
575 *Phytologist* **133**:321–332.
- 576 Loisel B, Sork V, Nason J, Graham C, 1995. Spatial genetic-structure of a tropical  
577 understory shrub, *Psychotria officinalis* (*Rubiaceae*). *American Journal of Botany* **82**:1420–1425.
- 578 Lung-Escarmant B, Guyon D, 2004. Temporal and spatial dynamics of primary and secondary  
579 infection by *Armillaria ostoyae* in a *Pinus pinaster* plantation. *Phytopathology* **94**:125–131.
- 580 McDonald B, Linde C, 2002. The population genetics of plant pathogens and breeding  
581 strategies for durable resistance. *Euphytica* **124**:163–180.
- 582 Meirmans P, Van Tienderen P, 2004. GENOTYPE and GENODIVE: two programs for the  
583 analysis of genetic diversity of asexual organisms. *Molecular Ecology Notes* **4**:792–794.
- 584 Neel MC, McKelvey K, Ryman N, et al, 2013. Estimation of effective population size in  
585 continuously distributed populations: there goes the neighborhood. *Heredity* **111**:189–199.
- 586 Nei M, 1987. *Molecular Evolutionary Genetics*, Columbia University Press. New York
- 587 Paquereau M-M, 1964. Flores et climats post-glaciaires en Gironde. *Actes de la Société*  
588 *Linnéenne de Bordeaux* **1**:156.
- 589 [Peay KG, Bruns TD, 2014. Spore dispersal of basidiomycete fungi at the landscape scale is  
590 driven by stochastic and deterministic processes and generates variability in plant–fungal  
591 interactions. \*New Phytologist\* \*\*204\*\*: 180–191. doi: 10.1111/nph.1290](#)

- 592 Prospero S, Lung-Escarmant B, Dutech C, 2008. Genetic structure of an expanding *Armillaria*  
593 root rot fungus (*Armillaria ostoyae*) population in a managed pine forest in southwestern France.  
594 *Molecular Ecology* **17**:3366–3378.
- 595 Puebla O, Bermingham E, McMillan WO, 2012. On the spatial scale of dispersal in coral reef  
596 fishes. *Molecular Ecology* **21**:5675–5688.
- 597 Raboin L-M, Selvi A, Oliveira KM, et al, 2007. Evidence for the dispersal of a unique lineage  
598 from Asia to America and Africa in the sugarcane fungal pathogen *Ustilago scitaminea*. *Fungal*  
599 *Genetics and Biology* **44**:64–76.
- 600 Raymond M, Rousset F, 1995. GENEPOP (version-1.2) - Population-genetics software for  
601 exact tests and ecumenicism. *Journal of Heredity* **86**:248–249.
- 602 Redfern D, Filip G, 1991. Inoculum and infection. In: Shaw CG III, Kile GA (Eds) *Armillaria*  
603 *root disease*, United States Department of Agriculture Forest Service Agriculture Handbook No.  
604 691. Washington, DC, pp 48–61.
- 605 Rieux A, Halkett F, de Bellaire L, et al, 2011. Inferences on pathogenic fungus population  
606 structures from microsatellite data: new insights from spatial genetics approaches. *Molecular*  
607 *Ecology* **20**:1661–1674.
- 608 Rieux A, Soubeyrand S, Bonnot F, et al, 2014. Long-Distance Wind-Dispersal of Spores in a  
609 Fungal Plant Pathogen: Estimation of Anisotropic Dispersal Kernels from an Extensive Field  
610 Experiment. *PLOS ONE*. doi: 10.1371/journal.pone.0103225
- 611 [Rishbeth J, 1970. The role of basidiospores in stump infection by \*Armillaria mellea\* In:](#)  
612 [Toussoun TA, Bega RV, Nelson PE \(Eds\) \*Root diseases and soil-borne pathogens. Proceedings of\*](#)  
613 [the 2nd international symposium on factors determining the behaviour of plant pathogens in soil.](#)  
614 [University of California Press: Berkeley, CA, pp. 141--146.](#)
- 615 Rishbeth J, 1988. Biological-control of air-borne pathogens. *Philosophical Transactions of*  
616 *the Royal Society of London Series B-Biological Sciences* **318**:265–281.
- 617 Rizzo D, May G, 1994. Nuclear replacement during mating in *Armillaria ostoyae*  
618 (*Basidiomycotina*). *Microbiology* **140**:2115–2124.
- 619 Rousset F, 1997. Genetic differentiation and estimation of gene flow from F-statistics under  
620 isolation by distance. *Genetics* **145**:1219–1228.
- 621 Rousset F, 2000. Genetic differentiation between individuals. *Journal of Evolutionary*  
622 *Biology* **13**:58–62.
- 623 Saleh D, Xu P, Shen Y, et al, 2012. Sex at the origin: an Asian population of the rice blast  
624 fungus *Magnaporthe oryzae* reproduces sexually. *Molecular Ecology* **21**:1330–1344.
- 625 Schwartz MK, McKelvey KS, 2009. Why sampling scheme matters: the effect of sampling  
626 scheme on landscape genetic results. *Conservation Genetics* **10**:441–452.
- 627 Smith M, Bruhn J, Anderson J, 1994. Relatedness and spatial distribution of *Armillaria* genets  
628 infecting red pine seedlings. *Phytopathology* **84**:822–829.



- 629 Taylor J, Jacobson D, Fisher M, 1999. The evolution of asexual fungi: Reproduction,  
630 speciation and classification. *Annual Review of Phytopathology* **37**:197–246.
- 631 Thrall P, Burdon J, 2002. Evolution of gene-for-gene systems in metapopulations: the effect  
632 of spatial scale of host and pathogen dispersal. *Plant Pathology* **51**:169–184.
- 633 Travadon R, Smith ME, Fujiyoshi P, et al, 2012. Inferring dispersal patterns of the generalist  
634 root fungus *Armillaria mellea*. *New Phytologist* **193**:959–969.
- 635 Waples RS, Do C, 2010. Linkage disequilibrium estimates of contemporary  $N_e$  using highly  
636 variable genetic markers: a largely untapped resource for applied conservation and evolution.  
637 *Evolutionary Applications* **3**:244–262.
- 638 Wargo P, Shaw C, 1985. Armillaria root-rot - the puzzle is being solved. *Plant Disease*  
639 **69**:826–832.
- 640 Weir B, Cockerham C, 1984. Estimating f-statistics for the analysis of population-structure.  
641 *Evolution* **38**:1358–1370.
- 642 Wingen LU, Brown JKM, Shaw MW, 2007. The population genetic structure of clonal  
643 organisms generated by exponentially bounded and fat-tailed dispersal. *Genetics* **177**:435–448.
- 644 Worrall J, 1994. Population-structure of *Armillaria* species in several forest types. *Mycologia*  
645 **86**:401–407.
- 646 Wright S, 1943. Isolation by distance. *Genetics* **28**:114–138.

647

## 648 **Figures**

649 **Figure 1: Relationships between the kinship coefficients of pairs of *A. ostoyae* samples ( $F_{ij}$ )**  
650 **and the distance class separating them.**

651 Range of each class was indicated in meters in bracket. Square symbols represent the kinship  
652 coefficients estimated using all the samples, and triangular symbols represent those estimated from  
653 only one copy per genotype (i.e. clonal correction). The light gray area corresponds to 95% of the  
654 expected kinship coefficient assuming a random spatial genetic structure for all samples considered,  
655 and the dark gray area corresponds to that based on only one copy per genotype.

656 **Figure 2: Geographic distribution of individual scores on the first positive axis of the sPCA**  
657 **for the *A. ostoyae* population of southwestern France**

658 Positive and negative values are shown in black and white, respectively, and the size of the squares  
659 is proportional to their absolute value. The eigenvalues of each sPCA axis are presented at the top  
660 right of the figure, and the geographical location of the site study in France at the bottom right.

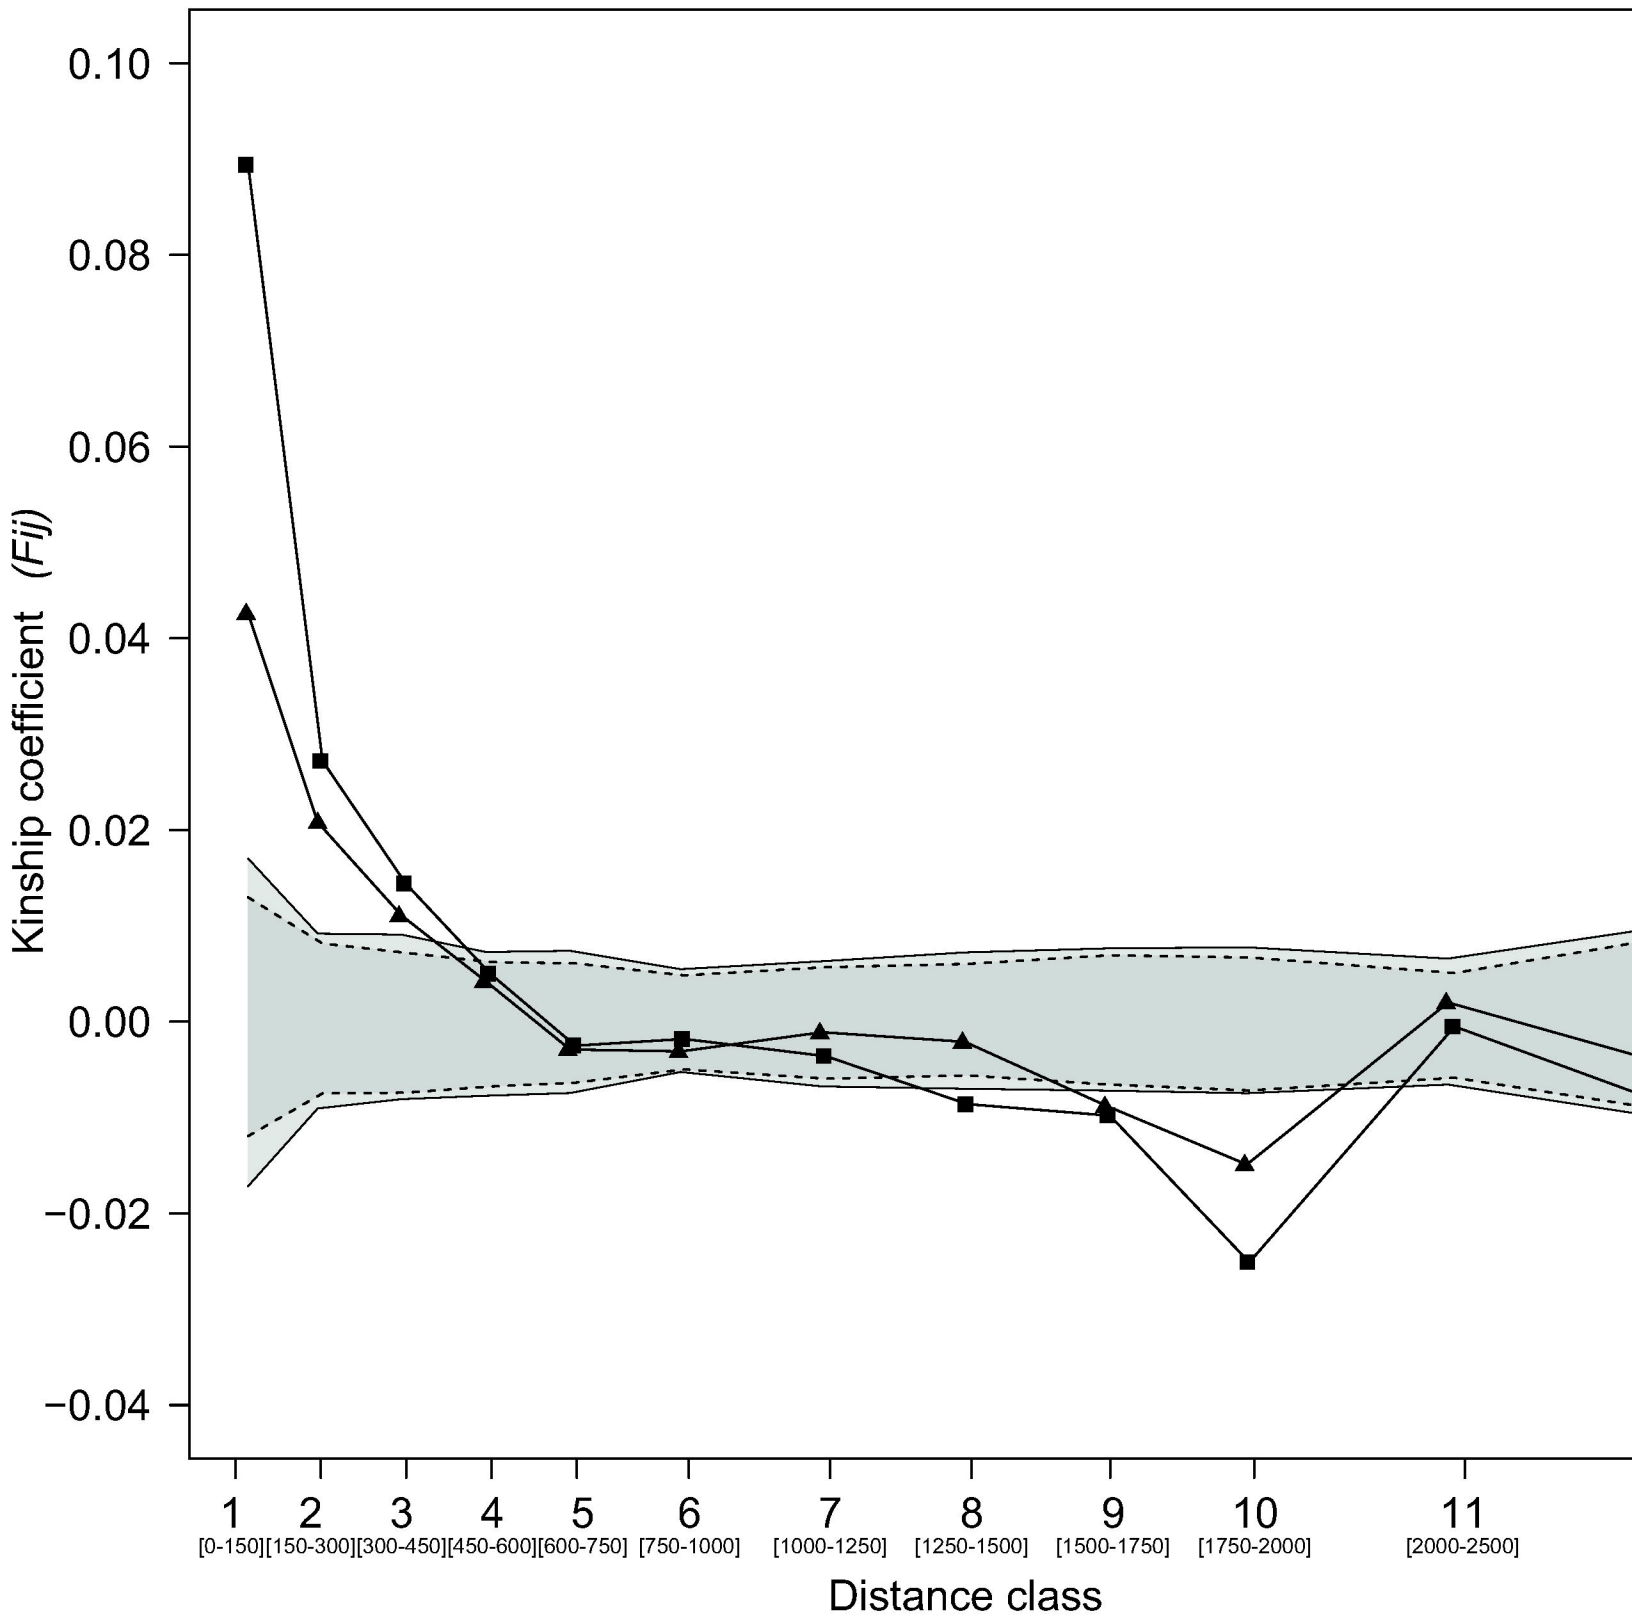

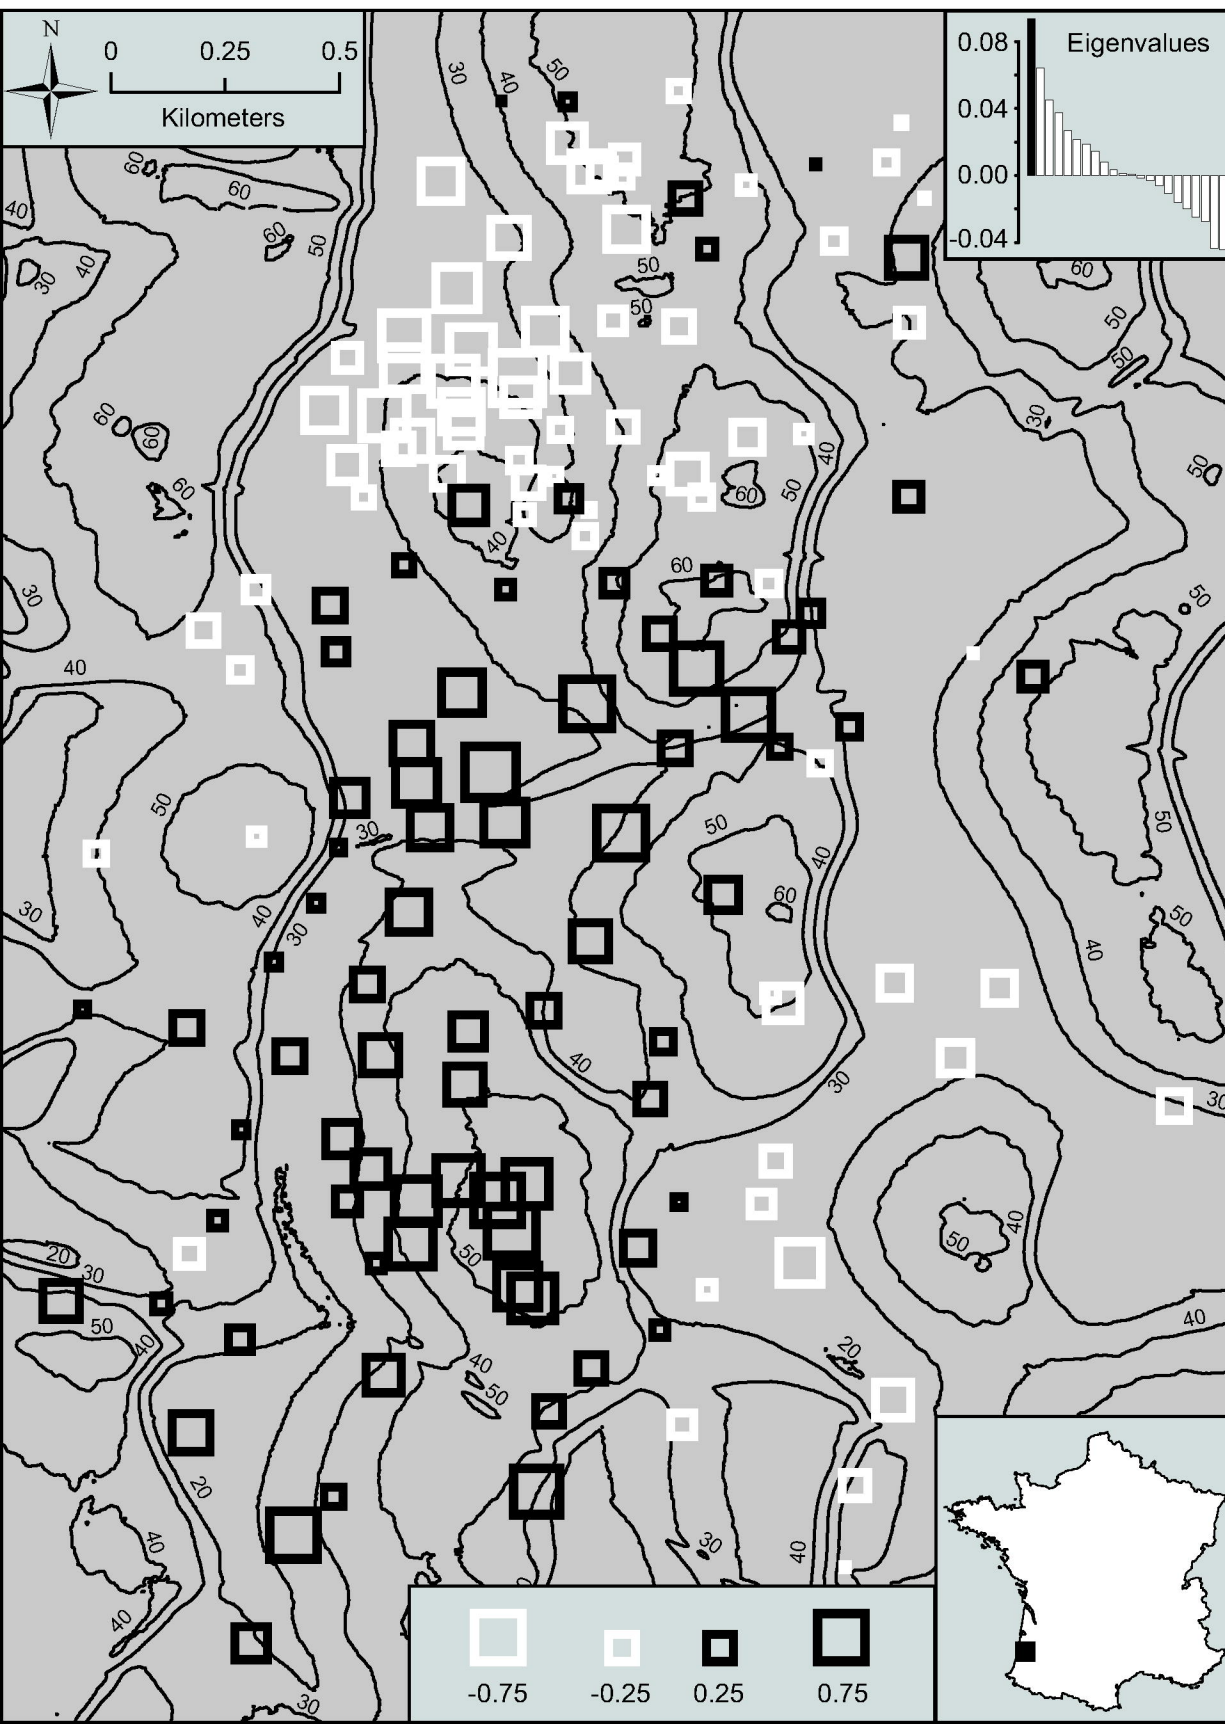

**TABLE 1: Details of the 27 single nucleotide polymorphisms (SNPs) analyzed in the *A. ostoyae* population sampled in the south-western French forest of St Julien en Born.**

| Gene  | SNP_ID  | 2nd-PCR                         | 1st-PCR                         | Length | SNP | He    | Fis          | P-val        |
|-------|---------|---------------------------------|---------------------------------|--------|-----|-------|--------------|--------------|
| FG487 | FG487_1 | ACGTTGGATGTCCCAAAGAACAGGGTTGTC  | ACGTTGGATGAGCACTGCTAACACGGATAG  | 103    | G/A | 0,364 | -0,125       | 0,174        |
| FG524 | FG524_3 | ACGTTGGATGTTCTATGATGTCCAGGTA    | ACGTTGGATGTTCCGGTCAAACGAGCGAATC | 95     | A/G | 0,420 | -0,061       | 0,553        |
| FG529 | FG529_1 | ACGTTGGATGGAACGTCATCATCAAGTGGC  | ACGTTGGATGAAAGCTCTTCCAGTCTTCCC  | 117    | C/T | 0,420 | <b>0,253</b> | <b>0,008</b> |
| FG543 | FG543_5 | ACGTTGGATGACACCTCTGCAAAGAAAACC  | ACGTTGGATGGCTGCCAAGGACTACGGTG   | 113    | G/A | 0,298 | 0,053        | 0,579        |
| FG652 | FG652_1 | ACGTTGGATGTGTATCCCATCTTCATAAC   | ACGTTGGATGAATTTGTTACCCCCCATCG   | 108    | C/T | 0,493 | -0,015       | 0,866        |
| FG686 | FG686_1 | ACGTTGGATGCAATCGTCTCGATCGCACTC  | ACGTTGGATGGACAAGGTCAAGTATTGGCAG | 120    | T/C | 0,243 | -0,050       | 0,739        |
| FG691 | FG691_1 | ACGTTGGATGTCCGGTAGCTTGTCTAGTAAC | ACGTTGGATGAACCTCGAATCTGCTCGCAC  | 117    | C/T | 0,501 | 0,096        | 0,411        |
| FG692 | FG692_2 | ACGTTGGATGCTAGGCTTCGAGTATTCGAG  | ACGTTGGATGTGCGTCAGAATTTCTCGTCC  | 100    | A/G | 0,497 | 0,029        | 0,738        |
| FG698 | FG698_3 | ACGTTGGATGCTTCGTATGCTACCGTTGTC  | ACGTTGGATGCGTGATAAAGAATCGGCCCTC | 100    | A/G | 0,466 | -0,050       | 0,596        |
| FG716 | FG716_1 | ACGTTGGATGTTGCTGGGGAAGACGGAAGT  | ACGTTGGATGATATGCTGCGGCTCAATGG   | 112    | C/T | 0,303 | 0,140        | 0,101        |
|       | FG716_8 | ACGTTGGATGATTGAGCCGCAGACATATGG  | ACGTTGGATGTACGGGTTTTTCCAATCCGC  | 118    | A/G | 0,368 | -0,013       | 1,000        |
| FG730 | FG730_3 | ACGTTGGATGCAGAAAGAATGTCTACCTCAG | ACGTTGGATGAAACATACTCCACCTCTCC   | 112    | C/T | 0,304 | 0,043        | 0,591        |
| FG735 | FG735_1 | ACGTTGGATGAGATGTCTCCGACGATGTTT  | ACGTTGGATGAATAGCTGCACGATTGAGG   | 116    | C/T | 0,483 | -0,151       | 0,083        |
| FG747 | FG747_4 | ACGTTGGATGGCTACGGACATCCTCGATAT  | ACGTTGGATGATTGTAGCCAGGGATCCCA   | 101    | T/C | 0,288 | -0,064       | 0,569        |
| FG756 | FG756_1 | ACGTTGGATGTAACATCGAAGCCGCCTTG   | ACGTTGGATGGCAGCGAGTGTGCAGAAAAC  | 101    | C/T | 0,501 | 0,016        | 0,869        |
| FG762 | FG762_5 | ACGTTGGATGTGGTATCGTATCGCTGGTC   | ACGTTGGATGTAAGTCTCTAGCTTGAGAA   | 118    | C/T | 0,386 | 0,043        | 0,667        |
| FG771 | FG771_1 | ACGTTGGATGGTCGAACCGTATTGTTACCG  | ACGTTGGATGTAAGGCTTCCAGCTACCATCG | 100    | C/G | 0,305 | -0,003       | 1,000        |
|       | FG771_3 | ACGTTGGATGACAAACTGCAATCGCGCTAC  | ACGTTGGATGATTTGCTGTTGCGAGTGGTG  | 108    | T/C | 0,478 | -0,011       | 1,000        |
| FG788 | FG788_1 | ACGTTGGATGACCCCGTAGCTGTTTCAGAC  | ACGTTGGATGGTCTGGACGATCGGACTTTG  | 91     | C/T | 0,084 | -0,043       | 1,000        |
| FG848 | FG848_1 | ACGTTGGATGTTGACCATCGTATCGAGACC  | ACGTTGGATGCGATTCTCTTGAGTCCCTAC  | 99     | G/A | 0,388 | -0,108       | 0,209        |
|       | FG848_6 | ACGTTGGATGCAGCCTTGAATTTGCCAATG  | ACGTTGGATGGCCATTCGCGTACTGATCT   | 114    | T/C | 0,254 | -0,064       | 0,743        |
| FG893 | FG893_1 | ACGTTGGATGTCTTGCGTTTTGCTAAGAGG  | ACGTTGGATGAAACGAGCAGCCAACCTTTG  | 116    | C/T | 0,362 | 0,030        | 0,819        |
| MS334 | MS334_3 | ACGTTGGATGAAACCAAGCATCGCGTCTC   | ACGTTGGATGAGTGAATGTTCAAGGCCAGC  | 108    | C/T | 0,413 | -0,006       | 1,000        |
| MS441 | MS441_2 | ACGTTGGATGTCTAACTGGAGTGGCGGTGT  | ACGTTGGATGATCAGTATCCAAAAGAAG    | 118    | A/G | 0,303 | 0,049        | 0,583        |
| MS452 | MS452_3 | ACGTTGGATGTCCAGAAATGAACCGAACC   | ACGTTGGATGCGTTGTTGATGTCAACCCAG  | 95     | T/C | 0,351 | 0,020        | 0,816        |
| MS467 | MS467_8 | ACGTTGGATGGCCAGTGAACGAACCTAAA   | ACGTTGGATGAGTCTTCCGCAAGGTGCGA   | 100    | C/A | 0,421 | <b>0,452</b> | <b>0,000</b> |
| MS481 | MS481_1 | ACGTTGGATGCTATCGATCAAGCAGACAC   | ACGTTGGATGCGCGGTTAATTGAGAAAAC   | 99     | C/T | 0,046 | -0,021       | 1,000        |

Gene and SNP\_ID (the ID of the analyzed SNP for each gene) refer to the gene and SNP identification given in Dutech et al. (2016). 1st- and 2ndPCR refer to the primers used for the Sequenom PCR reaction for each SNP. Length and SNP are respectively the size of the PCR product and the type of nucleotide variation. He and Fis are the gene diversity (Nei, 1987) and the intra-individual genetic fixation index respectively. P-val are the probabilities of the exact test for Hardy-Weinberg expectations (Raymond & Rousset 1995). Values significantly different from a panmictic population are in bold.
